# Supplementary material
Source: PeerJ journal article supplement (doi:10.7717/peerj-cs.3620)

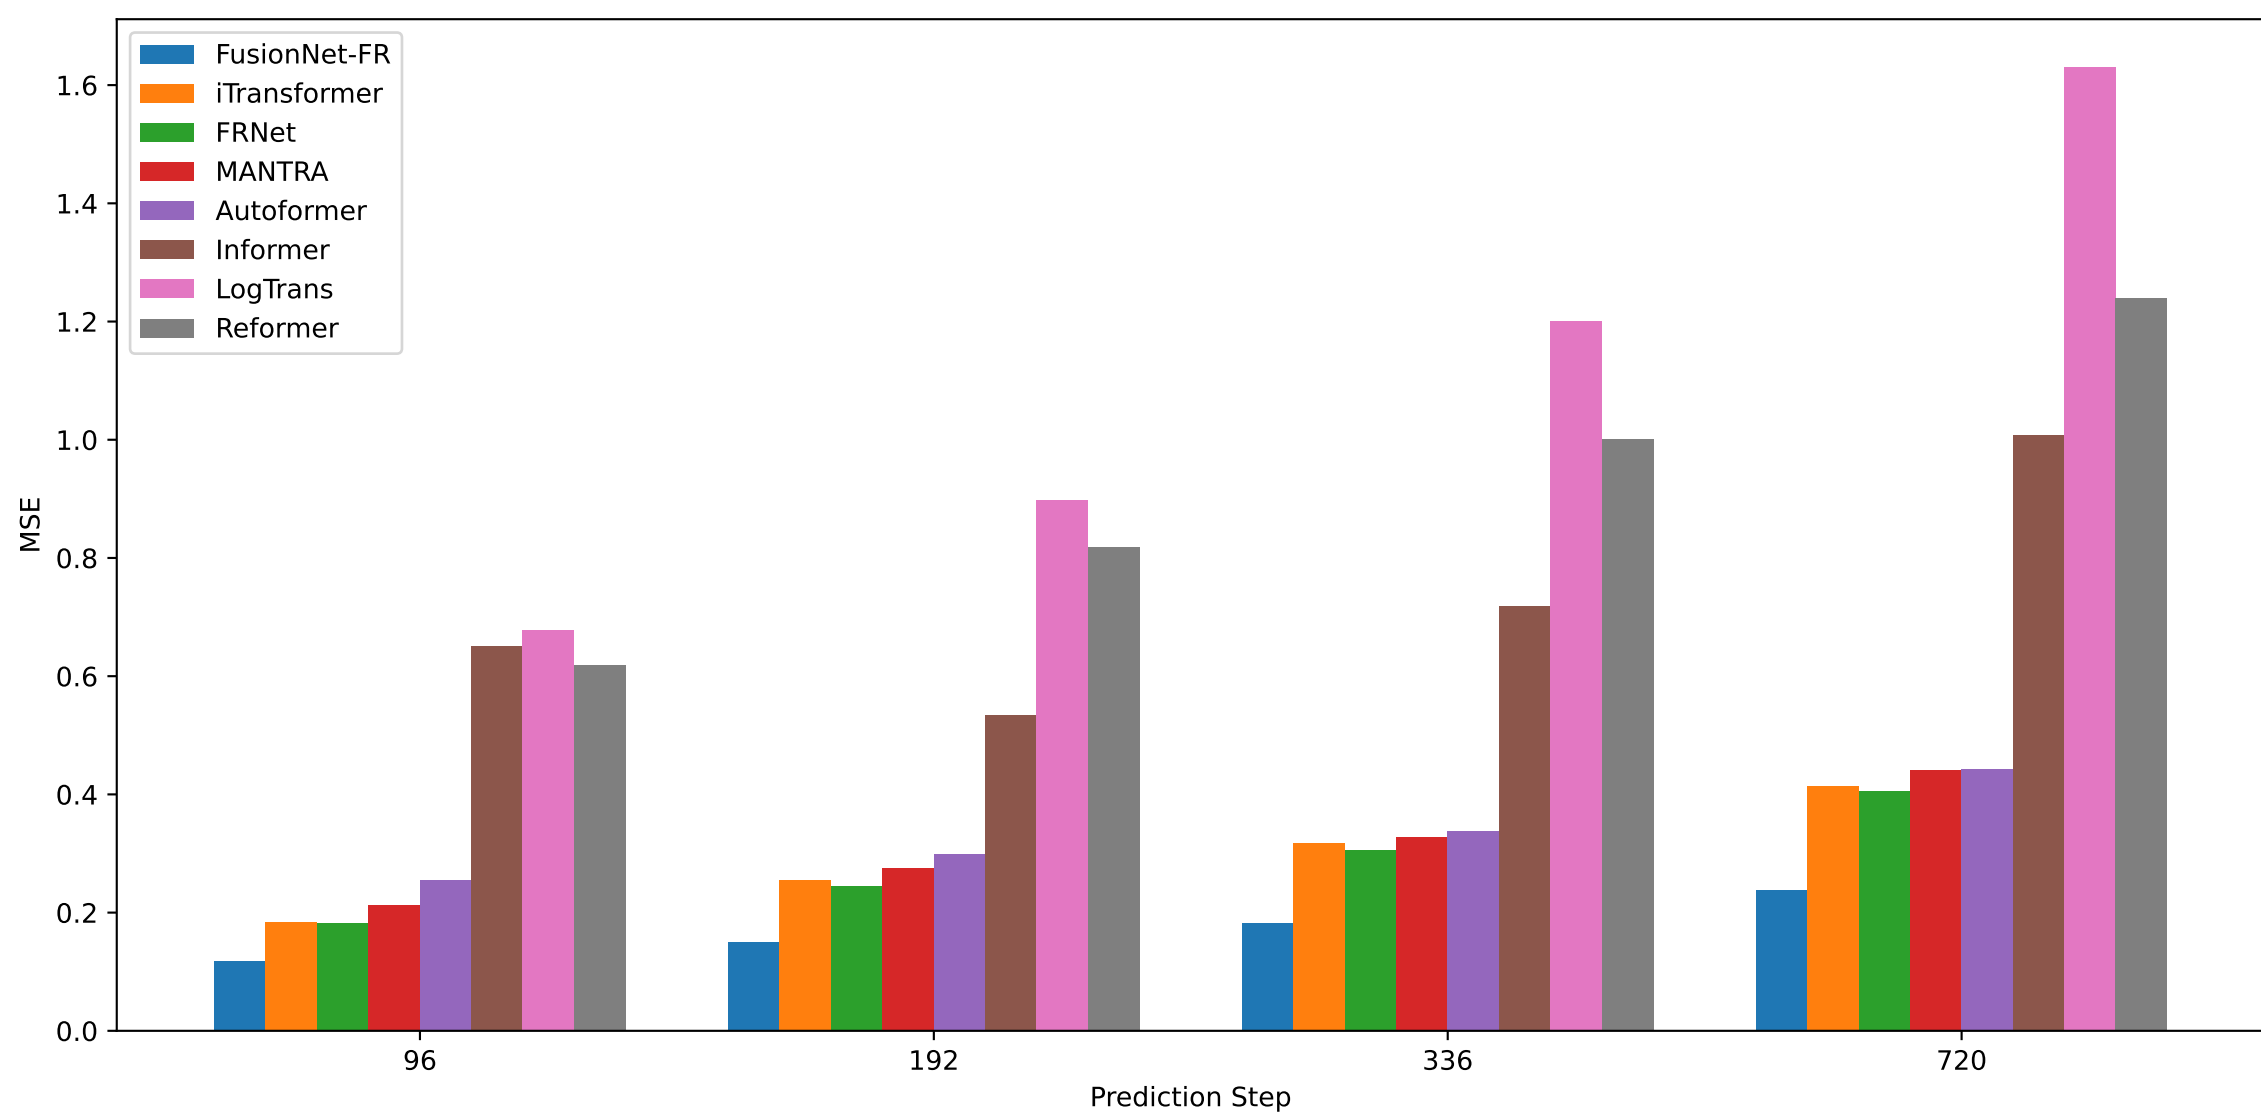

(a)

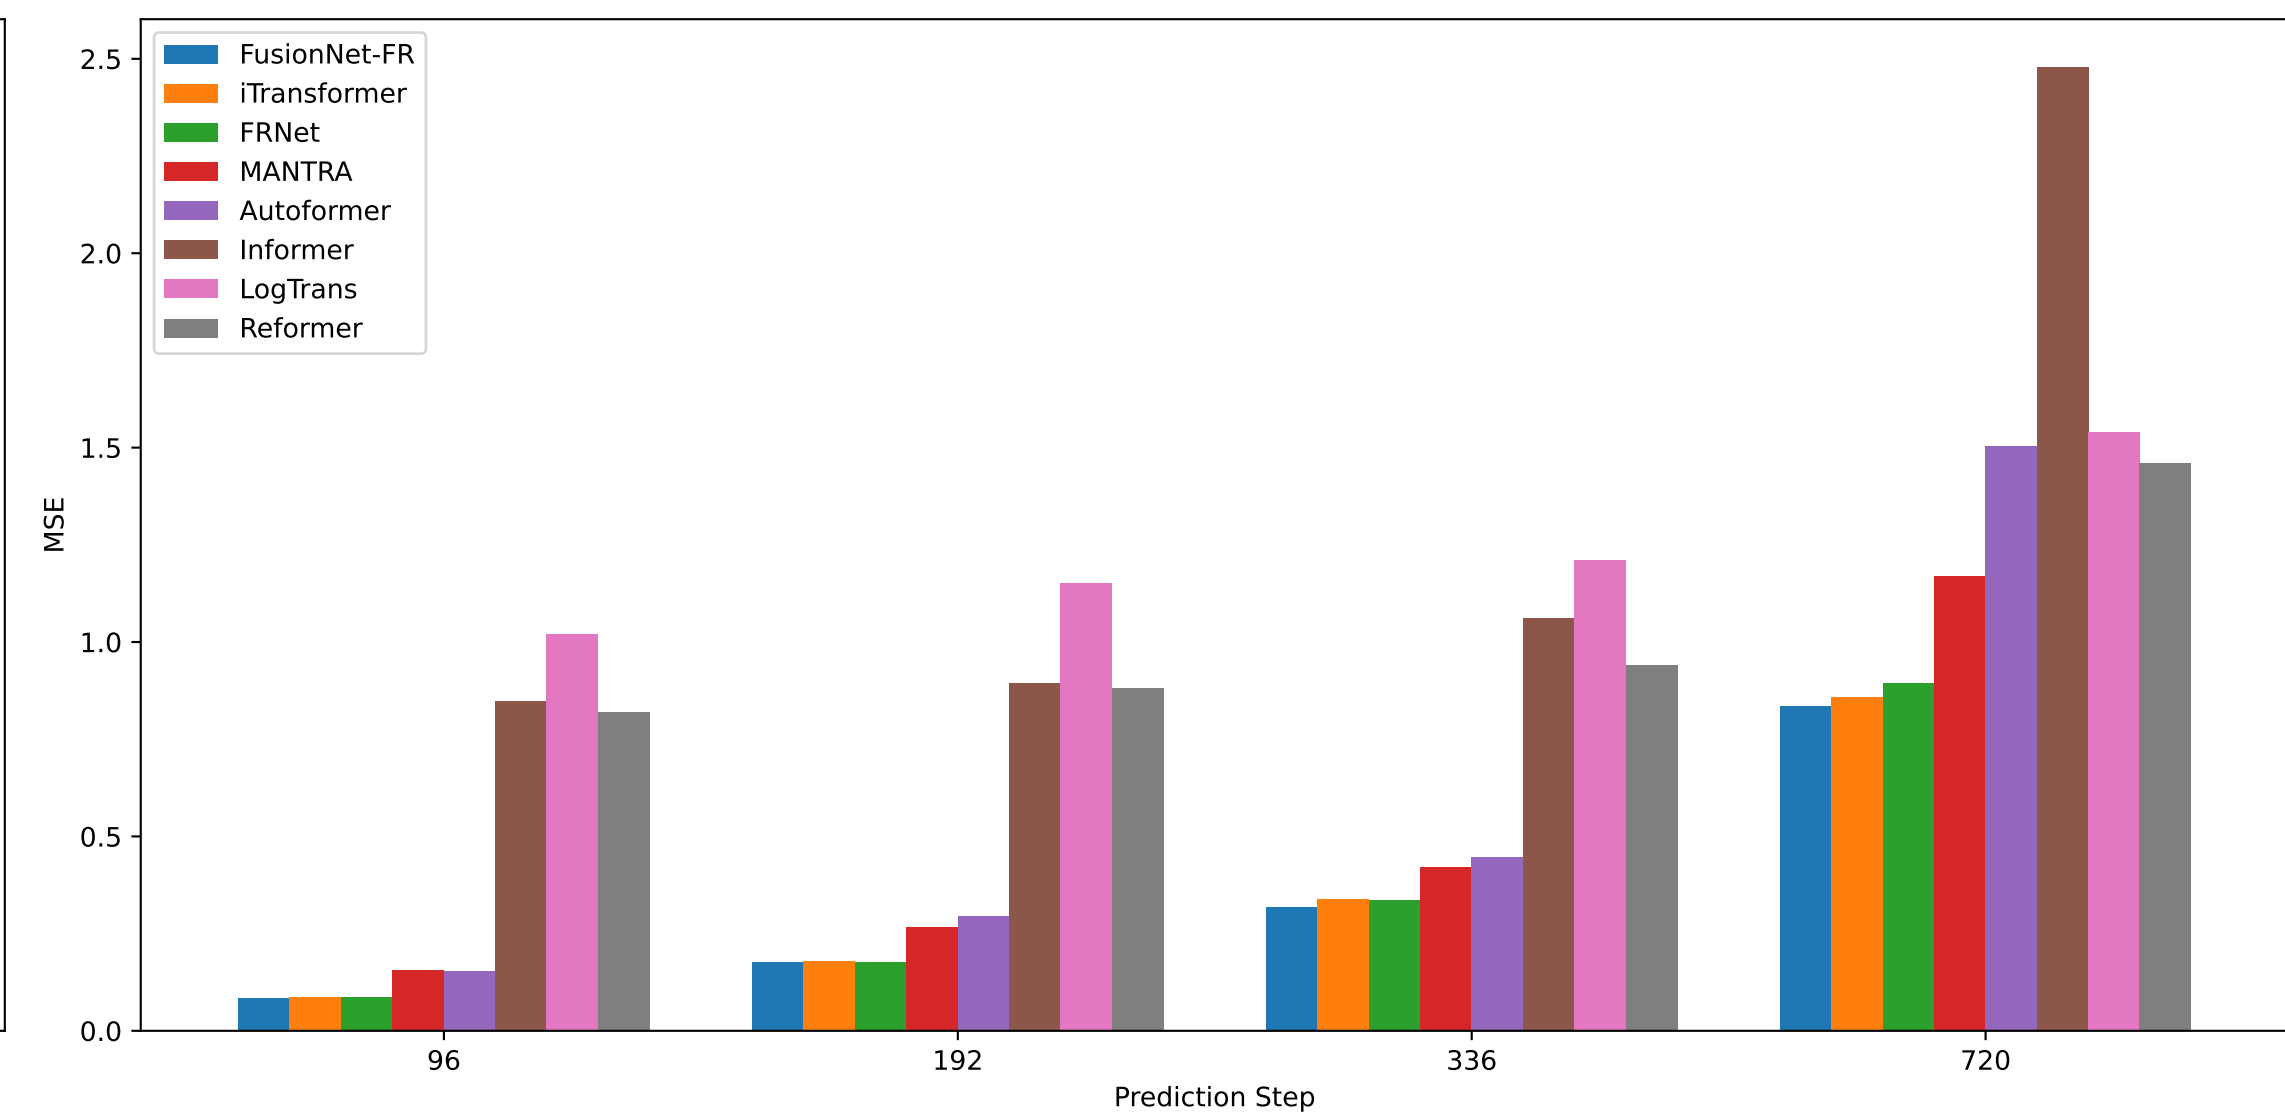

(b)

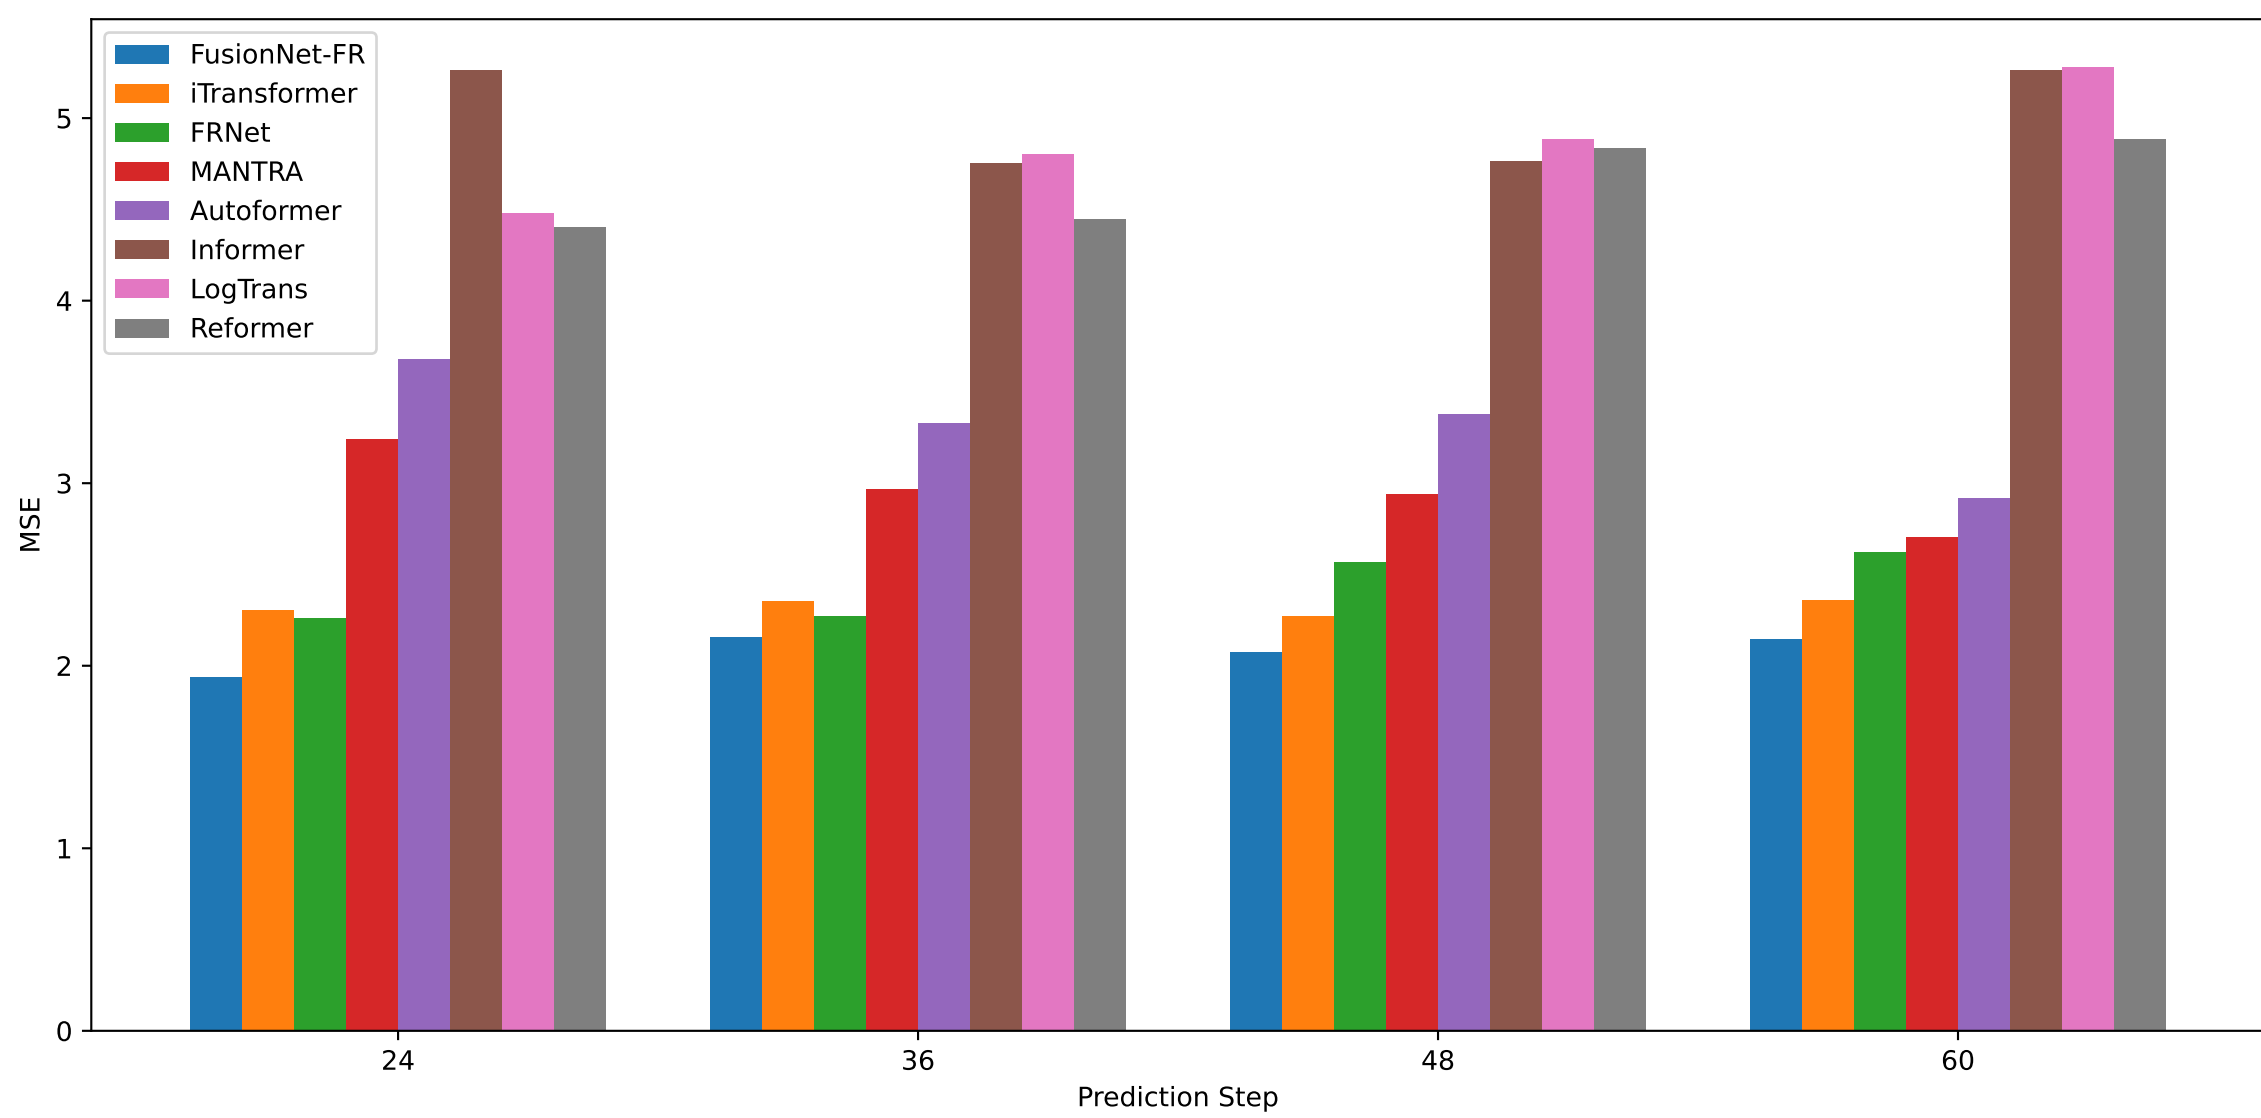

(c)

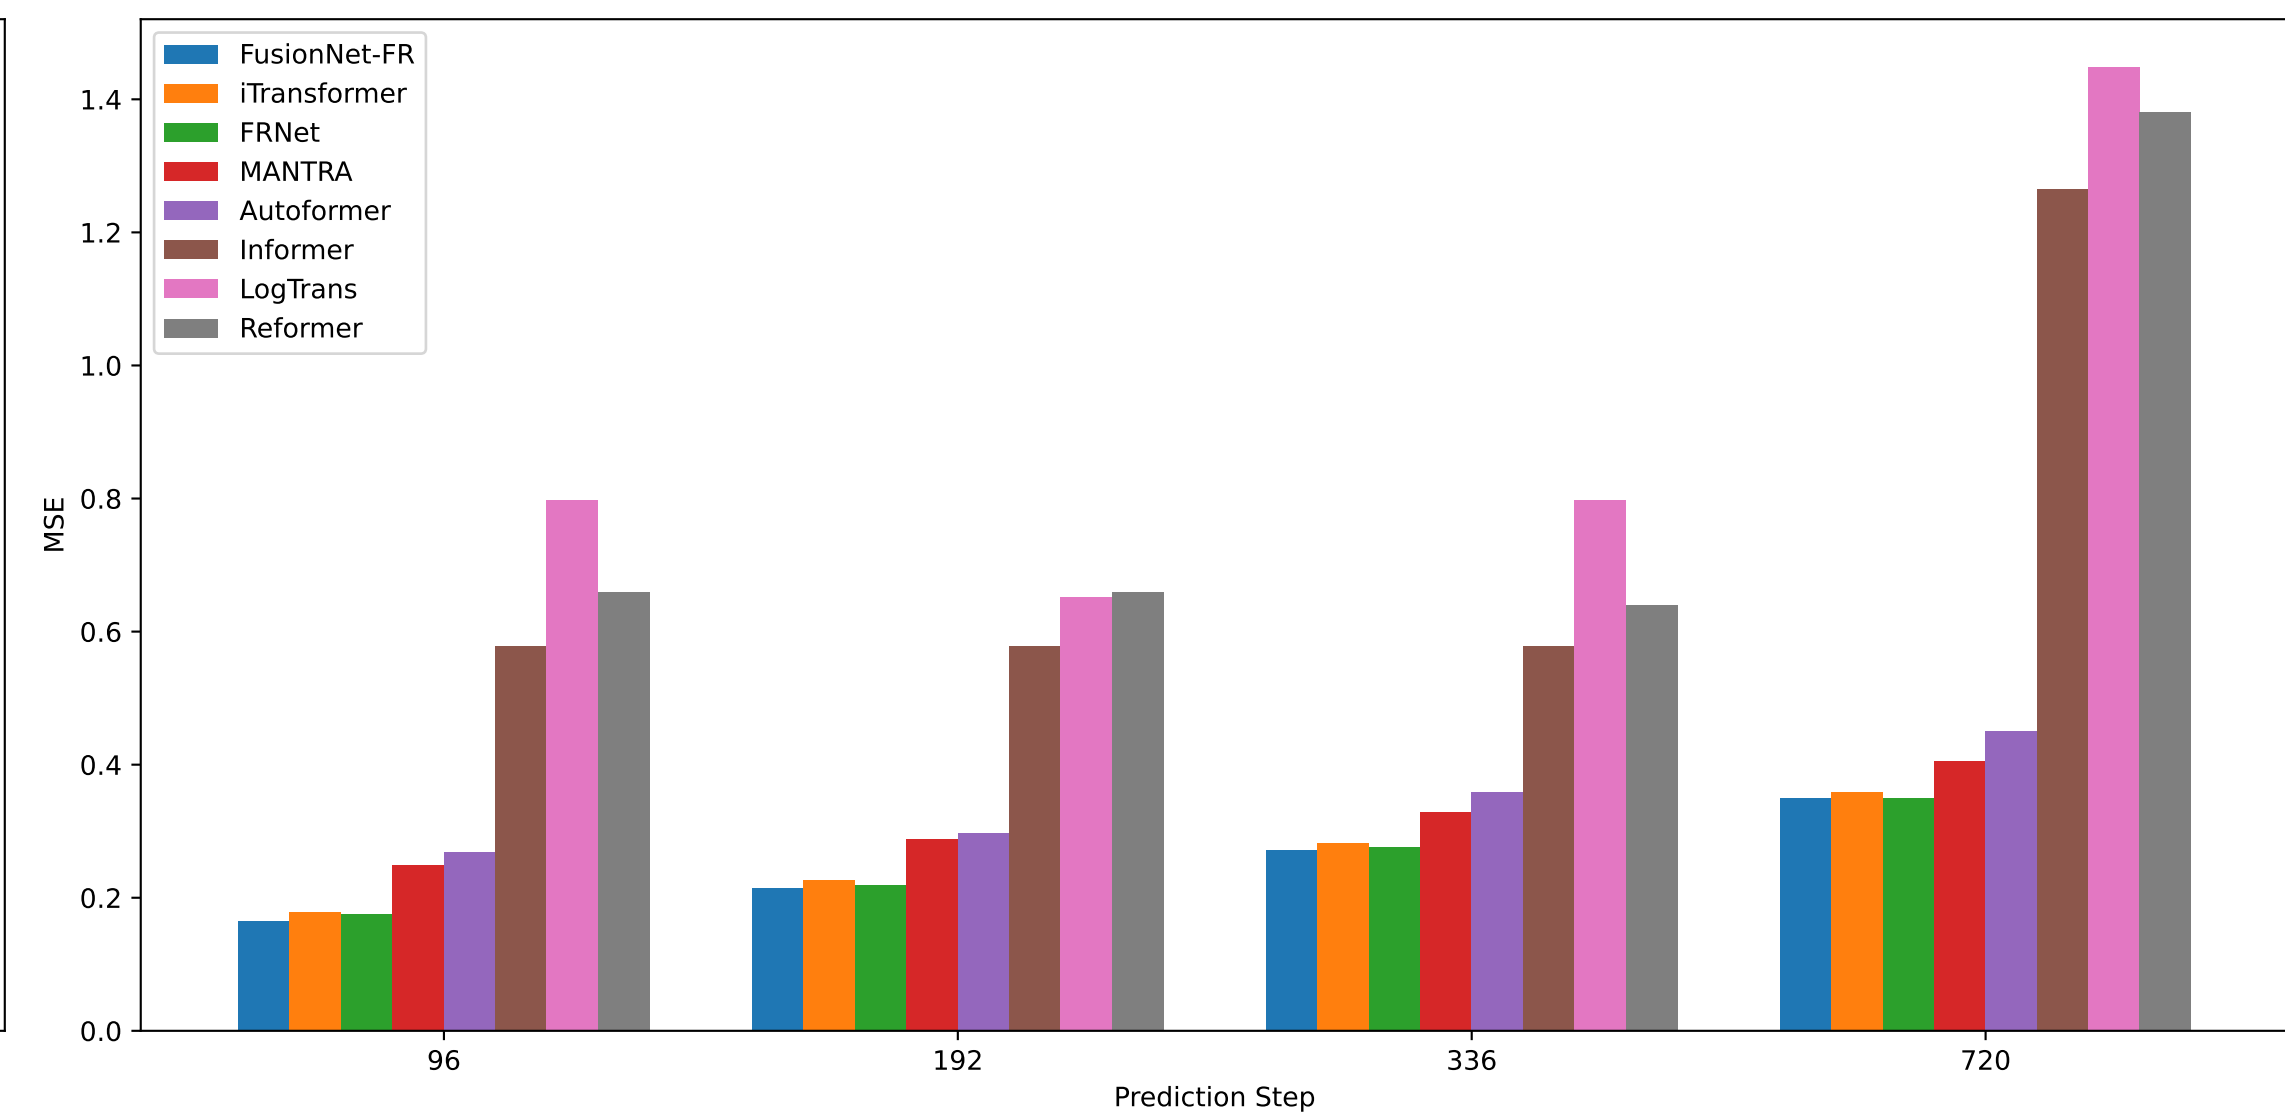

(d)

Supplement: Figure_A1.pdf [file Figure_A1.pdf]
